# Supplementary material for: Effects of 445 nm, 520 nm, and 638 nm Laser Irradiation on the Dermal Cells
Source: MDPI journal article supplement (doi:10.3390/ijms222111605), 2021-10-27
Supplement: s1 [file s1]

Detailed data describing viability and death type of KerCT keratinocytes and BJ-5ta fibroblasts exposed to 445 nm, 520 nm and 638 nm irradiation.

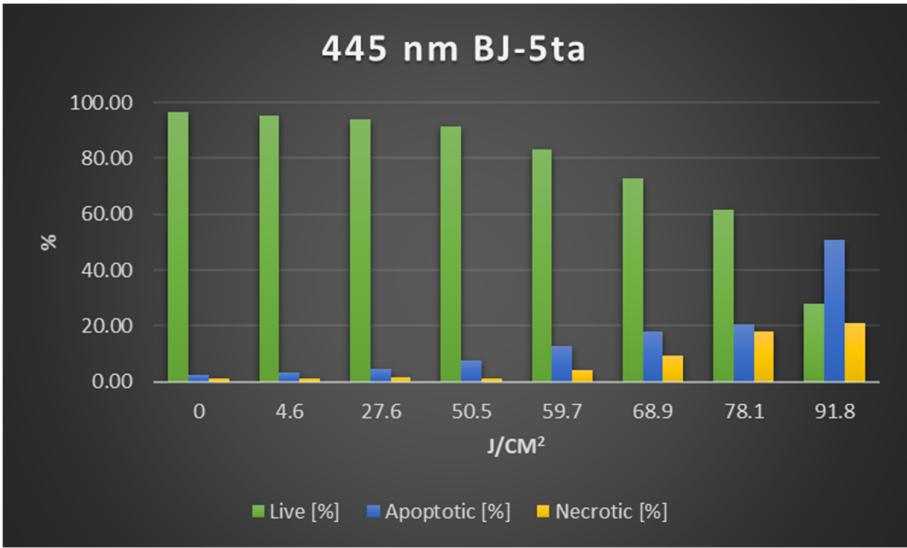

Figure S1. Graphical representation of viability and cell death type of BJ-5ta cells exposed to 445 nm irradiation.

Table S1. Summarized data of viability and cell death type of BJ-5ta cells exposed to 445 nm irradiation.

| 445 nm BJ-5ta |          |               |              |
|---------------|----------|---------------|--------------|
| J/Cm²         | Live [%] | Apoptotic [%] | Necrotic [%] |
| 0             | 96.67    | 2.29          | 1.04         |
| 4.6           | 95.32    | 3.40          | 1.28         |
| 27.6          | 93.99    | 4.66          | 1.35         |
| 50.5          | 91.17    | 7.60          | 1.23         |
| 59.7          | 83.06    | 12.92         | 4.02         |
| 68.9          | 72.84    | 17.98         | 9.17         |
| 78.1          | 61.36    | 20.61         | 18.03        |
| 91.8          | 27.90    | 50.89         | 21.16        |

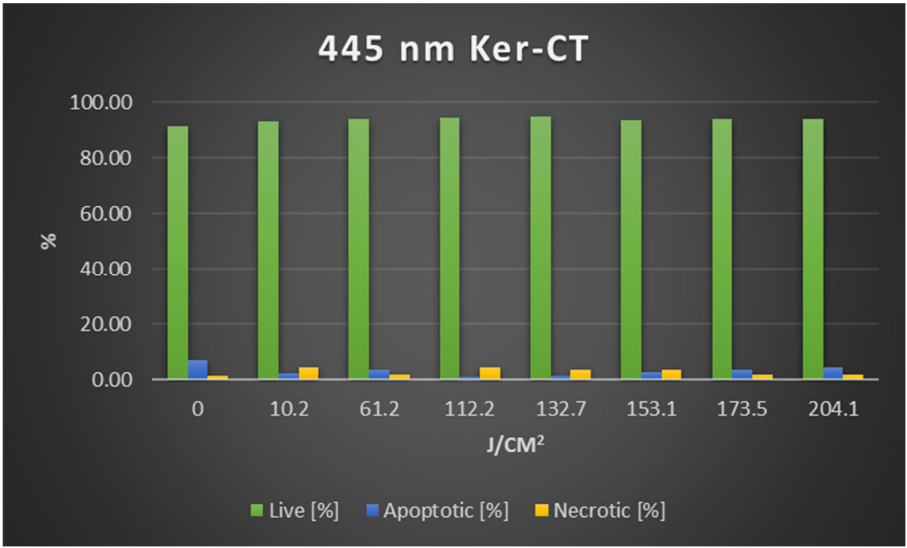

Figure S2. Graphical representation of viability and cell death type of Ker-CT cells exposed to 445 nm irradiation.

Table S2. Summarized data of viability and cell death type of KerCT cells exposed to 445 nm irradiation.

| <b>445 nm Ker-CT</b>    |                 |                      |                     |
|-------------------------|-----------------|----------------------|---------------------|
| <b>J/Cm<sup>2</sup></b> | <b>Live [%]</b> | <b>Apoptotic [%]</b> | <b>Necrotic [%]</b> |
| <b>0</b>                | 91.45           | 7.24                 | 1.31                |
| <b>10.2</b>             | 93.17           | 2.22                 | 4.62                |
| <b>61.2</b>             | 94.11           | 3.82                 | 2.07                |
| <b>112.2</b>            | 94.40           | 1.18                 | 4.42                |
| <b>132.7</b>            | 95.02           | 1.51                 | 3.47                |
| <b>153.1</b>            | 93.65           | 2.77                 | 3.58                |
| <b>173.5</b>            | 94.31           | 3.78                 | 1.90                |
| <b>204.1</b>            | 93.88           | 4.35                 | 1.77                |

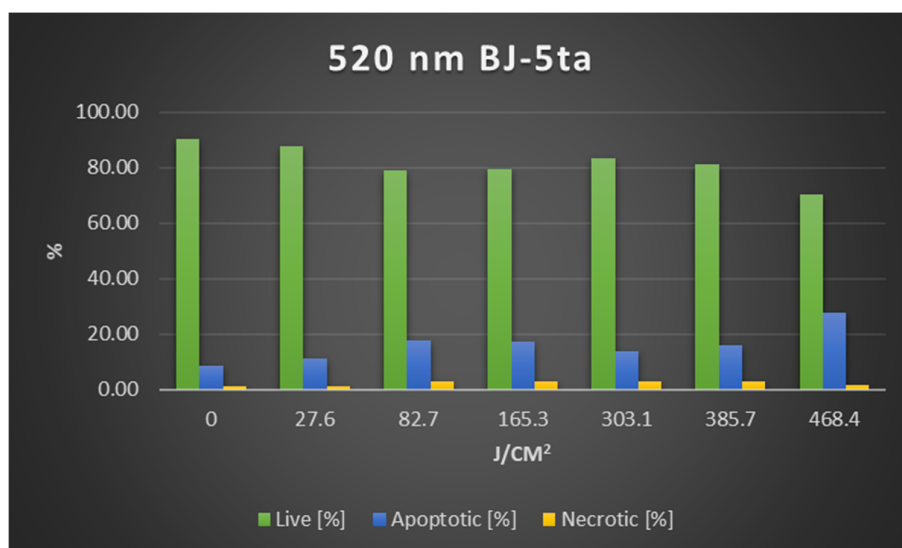

Figure S3. Graphical representation of viability and cell death type of BJ-5ta cells exposed to 520 nm irradiation.

Table S3. Summarized data of viability and cell death type of BJ-5ta cells exposed to 520 nm irradiation.

| <b>520 nm BJ-5ta</b>    |                 |                      |                     |
|-------------------------|-----------------|----------------------|---------------------|
| <b>J/Cm<sup>2</sup></b> | <b>Live [%]</b> | <b>Apoptotic [%]</b> | <b>Necrotic [%]</b> |
| <b>0</b>                | 90.19           | 8.59                 | 1.22                |
| <b>27.6</b>             | 87.68           | 11.15                | 1.17                |
| <b>82.7</b>             | 78.99           | 17.87                | 3.14                |
| <b>165.3</b>            | 79.52           | 17.41                | 3.07                |
| <b>303.1</b>            | 83.35           | 13.74                | 2.92                |
| <b>385.7</b>            | 81.06           | 15.95                | 3.00                |
| <b>468.4</b>            | 70.40           | 27.86                | 1.75                |

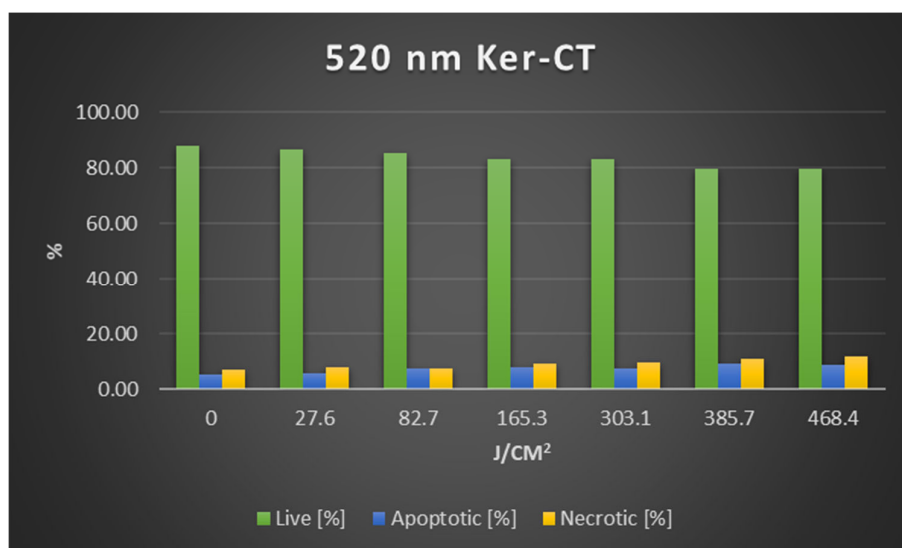

Figure S4. Graphical representation of viability and cell death type of Ker-CT cells exposed to 520 nm irradiation.

Table S4. Summarized data of viability and cell death type of KerCT cells exposed to 520 nm irradiation.

| 520 nm Ker-CT     |          |               |              |
|-------------------|----------|---------------|--------------|
| J/Cm <sup>2</sup> | Live [%] | Apoptotic [%] | Necrotic [%] |
| 0                 | 87.65    | 5.27          | 7.09         |
| 27.6              | 86.57    | 5.72          | 7.71         |
| 82.7              | 85.24    | 7.27          | 7.49         |
| 165.3             | 83.10    | 7.79          | 9.12         |
| 303.1             | 82.94    | 7.45          | 9.61         |
| 385.7             | 79.75    | 9.24          | 11.02        |
| 468.4             | 79.44    | 8.68          | 11.89        |

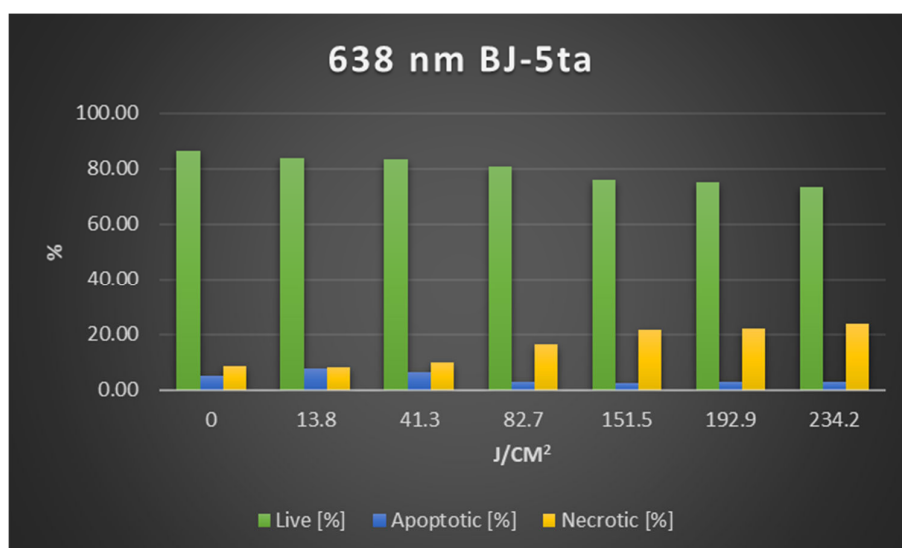

Figure S5. Graphical representation of viability and cell death type of BJ-5ta cells exposed to 638 nm irradiation.

Table S5. Summarized data of viability and cell death type of BJ-5ta cells exposed to 638 nm irradiation.

| <b>638 nm BJ-5ta</b>    |                 |                      |                     |
|-------------------------|-----------------|----------------------|---------------------|
| <b>J/Cm<sup>2</sup></b> | <b>Live [%]</b> | <b>Apoptotic [%]</b> | <b>Necrotic [%]</b> |
| <b>0</b>                | 86.22           | 5.07                 | 8.71                |
| <b>13.8</b>             | 83.78           | 7.84                 | 8.38                |
| <b>41.3</b>             | 83.56           | 6.53                 | 9.91                |
| <b>82.7</b>             | 80.87           | 2.80                 | 16.33               |
| <b>151.5</b>            | 75.81           | 2.43                 | 21.76               |
| <b>192.9</b>            | 74.92           | 3.02                 | 22.07               |
| <b>234.2</b>            | 73.26           | 2.80                 | 23.94               |

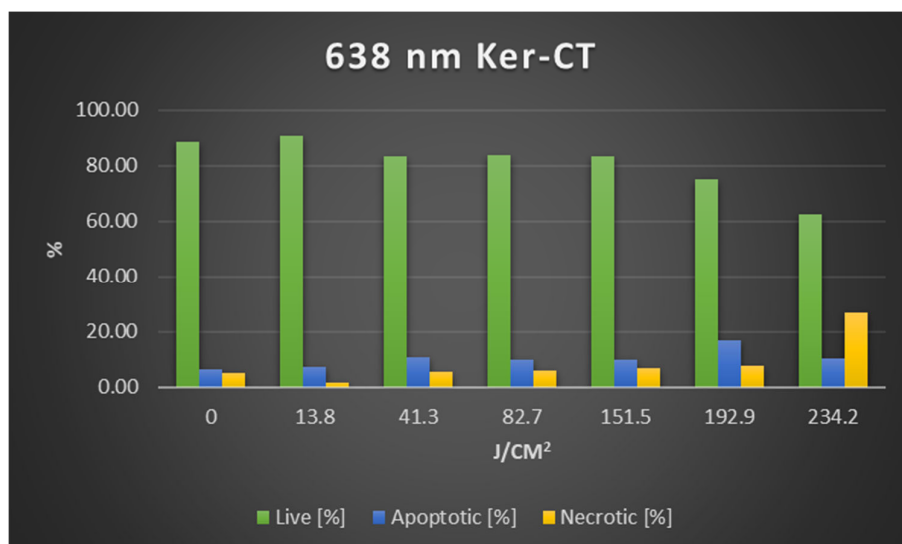

Figure S6. Graphical representation of viability and cell death type of Ker-CT cells exposed to 638 nm irradiation.

Table S6. Summarized data of viability and cell death type of KerCT cells exposed to 638 nm irradiation.

| <b>638 nm Ker-CT</b>    |                 |                      |                     |
|-------------------------|-----------------|----------------------|---------------------|
| <b>J/Cm<sup>2</sup></b> | <b>Live [%]</b> | <b>Apoptotic [%]</b> | <b>Necrotic [%]</b> |
| <b>0</b>                | 88.71           | 6.27                 | 5.02                |
| <b>13.8</b>             | 90.97           | 7.34                 | 1.69                |
| <b>41.3</b>             | 83.43           | 10.80                | 5.76                |
| <b>82.7</b>             | 84.05           | 9.73                 | 6.21                |
| <b>151.5</b>            | 83.28           | 9.93                 | 6.80                |
| <b>192.9</b>            | 75.32           | 16.69                | 7.99                |
| <b>234.2</b>            | 62.60           | 10.47                | 26.94               |
